# Supplementary material
Source: publisher figshare collection journal article supplement (https://springernature.figshare.com/ndownloader/files/22105014)
Supplement: Supplementary file [file 22105014]

**Multimedia Appendix 1:** Items from the World Health Organization Trial Registration Data Set

| <b>Data Category</b>                     | <b>Information</b>                                                                                                                                        |
|------------------------------------------|-----------------------------------------------------------------------------------------------------------------------------------------------------------|
| Trial Identifier                         | ClinicalTrials.gov NCT03309137                                                                                                                            |
| Date of registration                     | October 13, 2017                                                                                                                                          |
| Secondary Identifying Numbers            | HIREB Project Number: 3654                                                                                                                                |
| Sources of Monetary and Material Support | ICU Medical<br>ATTWILL                                                                                                                                    |
| Primary Sponsor                          | ICU Medical                                                                                                                                               |
| Public Title                             | Pilot trial for a chlorhexidine locking device                                                                                                            |
| Scientific Title                         | Chlorhexidine locking device for central line infection prevention in ICU patients: Study protocol for an open-label, randomized, pilot feasibility trial |
| Countries of Recruitment                 | Canada                                                                                                                                                    |
| Health Condition Studied                 | Central-Line Associated Bloodstream Infection (CLABSI)                                                                                                    |
| Intervention                             | Intervention group: CHG locking device, Chloralock™                                                                                                       |
|                                          | Control group: usual care                                                                                                                                 |
| Inclusion and Exclusion Criteria         | Inclusion: Adults (>18) within 72 hours of ICU admission and with a central line expected to remain in situ for at least 72 hours.                        |
|                                          | Exclusion: Suspected infection with antibiotic treatment, chronic indwelling catheters, poor prognosis, and chlorhexidine allergy.                        |
| Study Type                               | Interventional, randomized, open-label, feasibility study.                                                                                                |
| Date of First Enrollment                 | November 2017                                                                                                                                             |
| Target Enrollment                        | 100                                                                                                                                                       |
| Recruitment Status                       | Recruiting                                                                                                                                                |
| Primary Outcomes                         | Recruitment rate, consent rate, protocol adherence, comfort level.                                                                                        |
| Secondary Outcomes                       | Central line colonization, bacteremia, clinical end points.                                                                                               |
